# Supplementary material for: Surface chemical modification of poly(dimethylsiloxane) for stabilizing antibody immobilization and T cell cultures
Source: Royal Society of Chemistry journal article supplement (doi:10.1039/d3bm01729j), 2024-01-01
Supplement: d3bm01729j1.pdf [file d3bm01729j1.pdf]

## Supporting Information

# Surface Chemical Modification of Poly(dimethylsiloxane) for Stabilizing Antibody Immobilization and T cell Cultures

*Qiongjiao Zeng<sup>‡</sup>, Bowen Xu<sup>‡</sup>, Cheng Qian, Nan Li\*, Zhenhong Guo\*, Shuqing Wu\**

a. School of Materials Science and Engineering, South China University of Technology, Guangzhou, 510640, China

b. National Key Laboratory of Medical Immunology & Institute of Immunology, Second Military Medical University, Shanghai, 200433, China

1. These authors contributed equally to this work.

\* Corresponding Author.

E-mail: [wushuqing@scut.edu.cn](mailto:wushuqing@scut.edu.cn), [guozh@immunol.org](mailto:guozh@immunol.org), [linan@immunol.org](mailto:linan@immunol.org)

## **Content**

Figure S1: (A) Representative confocal microscopy images of various PDMS surfaces coated with FITC-conjugated anti-mouse CD3e. Scale bars = 100  $\mu\text{m}$ . (B) Comparison of the MFI of different PDMS surfaces at 0-2 days after coating.

Figure S2: Surface topography (A) and root-mean-square (RMS) roughness (B) of various PDMS surfaces coated with antibodies are presented.

Figure S3. Representative bright-field microscopy images of mouse T cells cultured with various PDMS surfaces. Scale bars = 50  $\mu\text{m}$ .

Figure S4. Gating strategy for flow cytometry. (A) Gating of lymphocytes, living cells and CD4<sup>+</sup> T cells for expression of CD69 and CFSE dilution. (B) Gating of lymphocytes and living cells for expression of cytokines or transcription factors.

Figure S5. Enhanced T cell activation and proliferation by CD3/CD28 activating antibody immobilized on PDMS.

Figure S6. PDMS substrates enhance Th1 and Th2 cell differentiation.

Table S1: Summary of the XPS results.

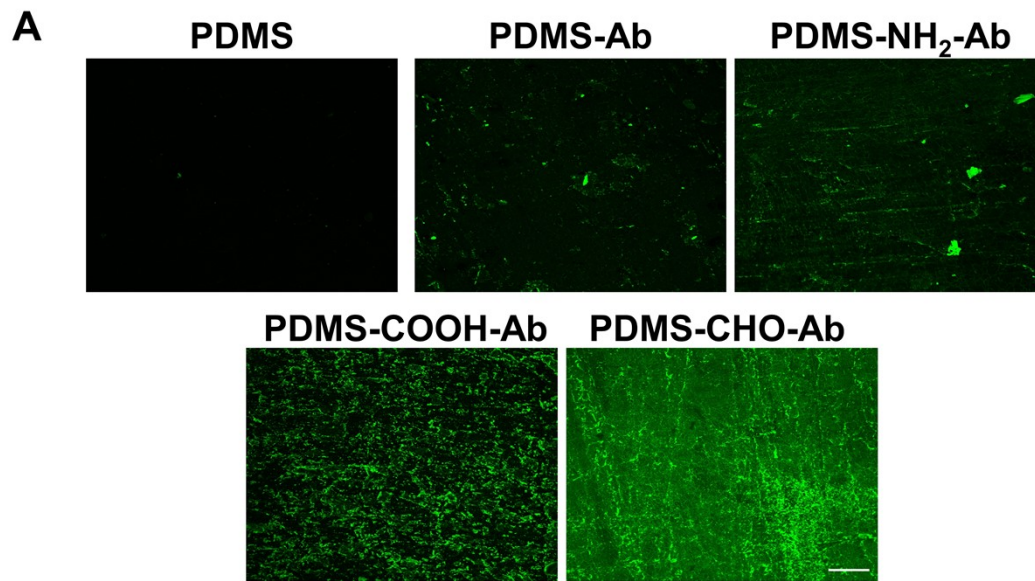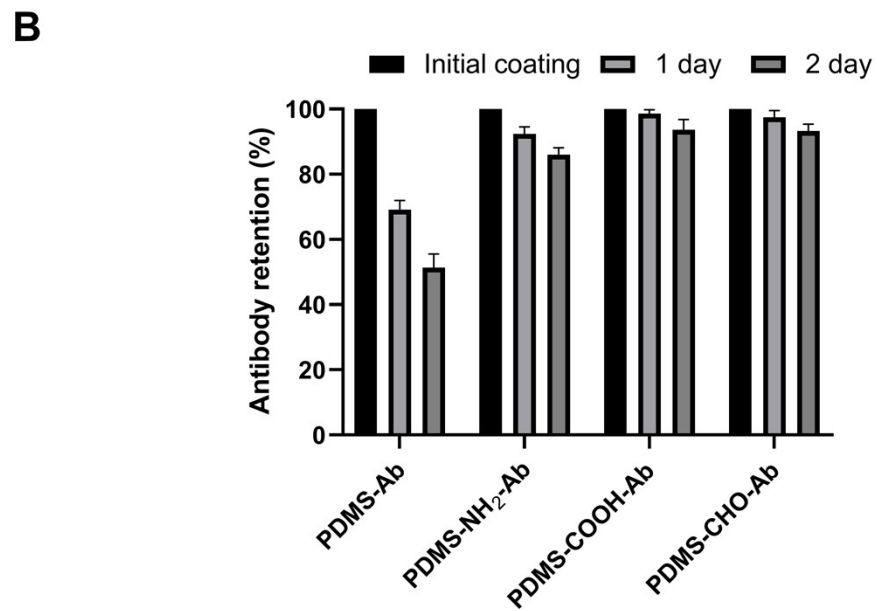

Figure S1: (A) Representative confocal microscopy images of various PDMS surfaces coated with FITC-conjugated anti-mouse CD3e. Scale bars = 100  $\mu$ m. (B) Comparison of the MFI of different PDMS surfaces at 0-2 days after coating.

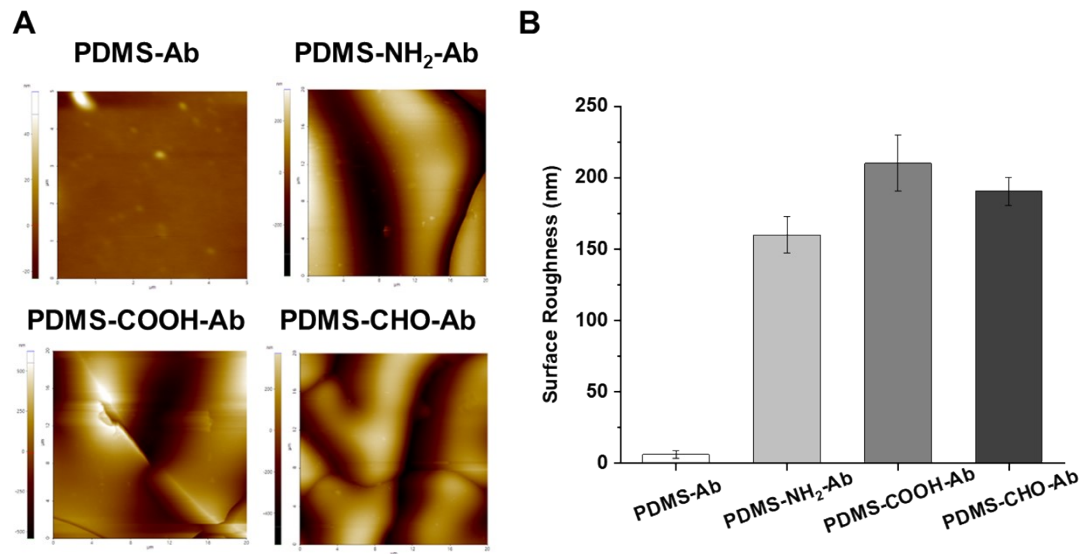

Figure S2: Surface topography (A) and root-mean-square (RMS) roughness (B) of various PDMS surfaces coated with antibodies are presented.

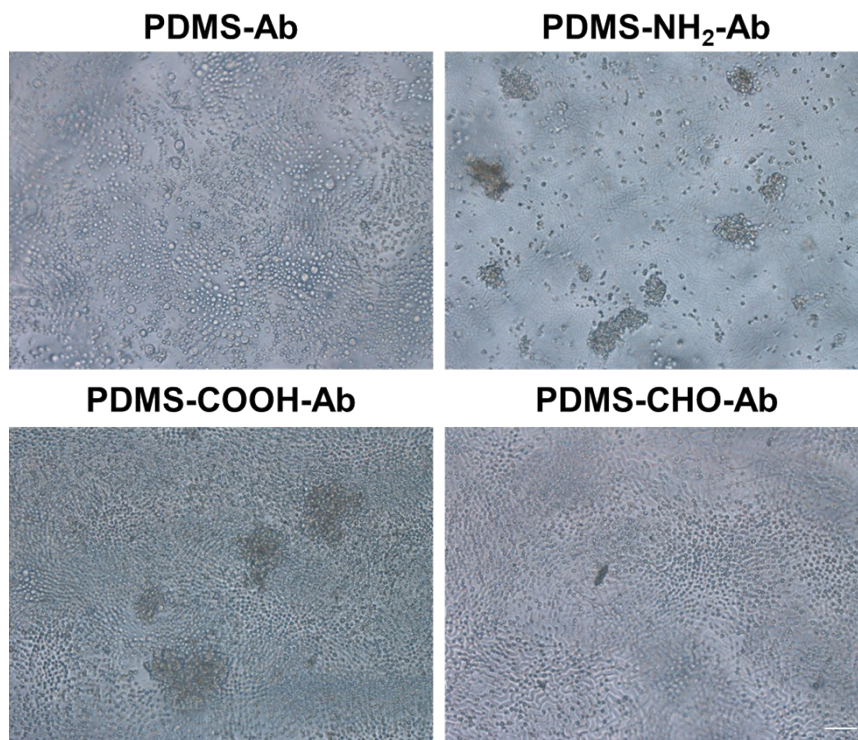

Figure S3: Representative bright-field microscopy images of mouse T cells cultured with various PDMS surfaces.

Scale bars = 50  $\mu$ m.

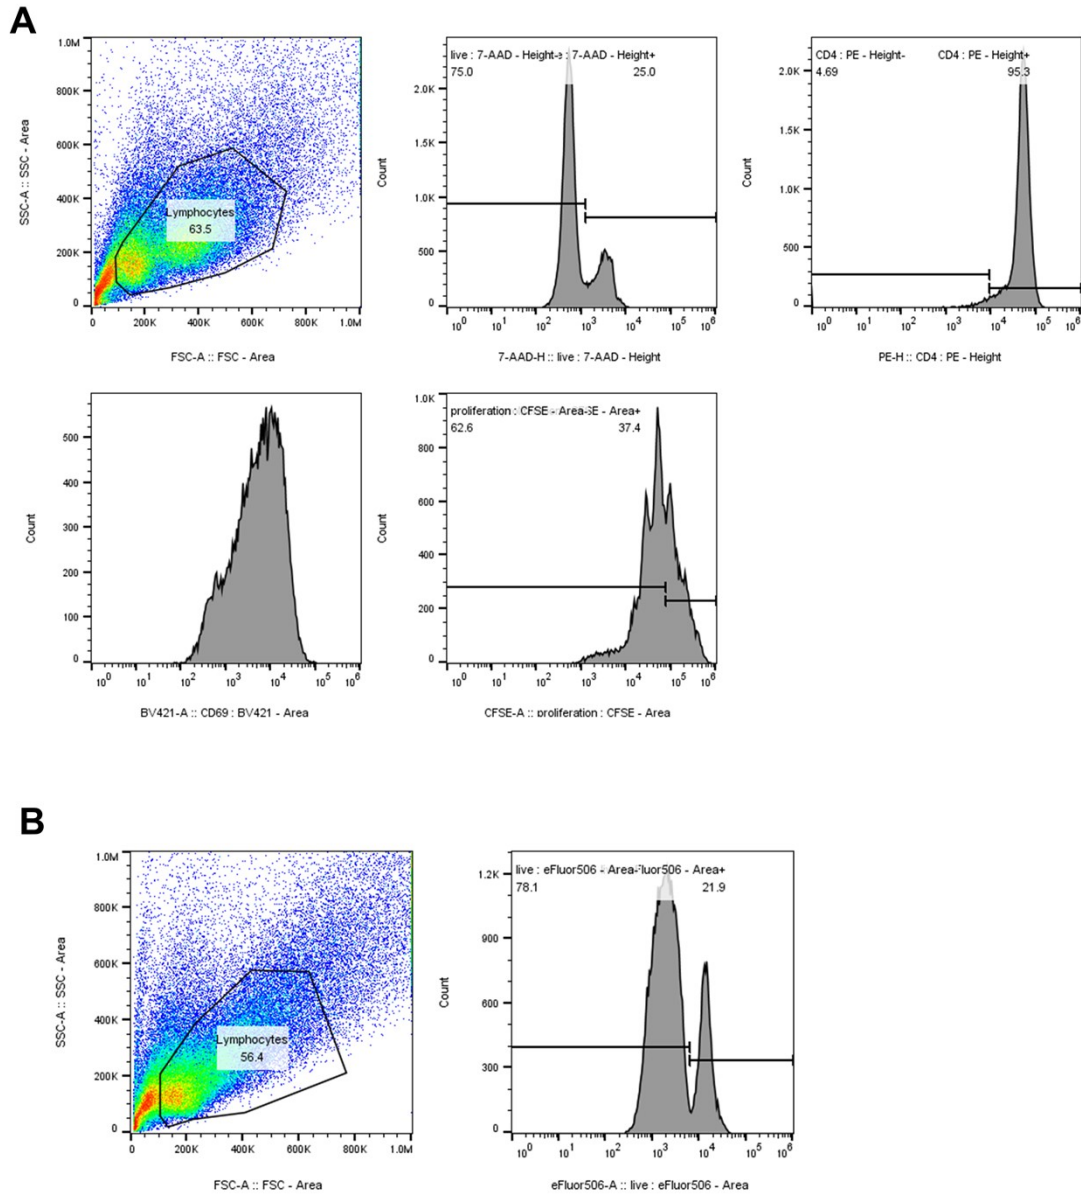

Figure S4. Gating strategy for flow cytometry. (A) Gating of lymphocytes, living cells and CD4<sup>+</sup> T cells for expression of CD69 and CFSE dilution. (B) Gating of lymphocytes and living cells for expression of cytokines or transcription factors.

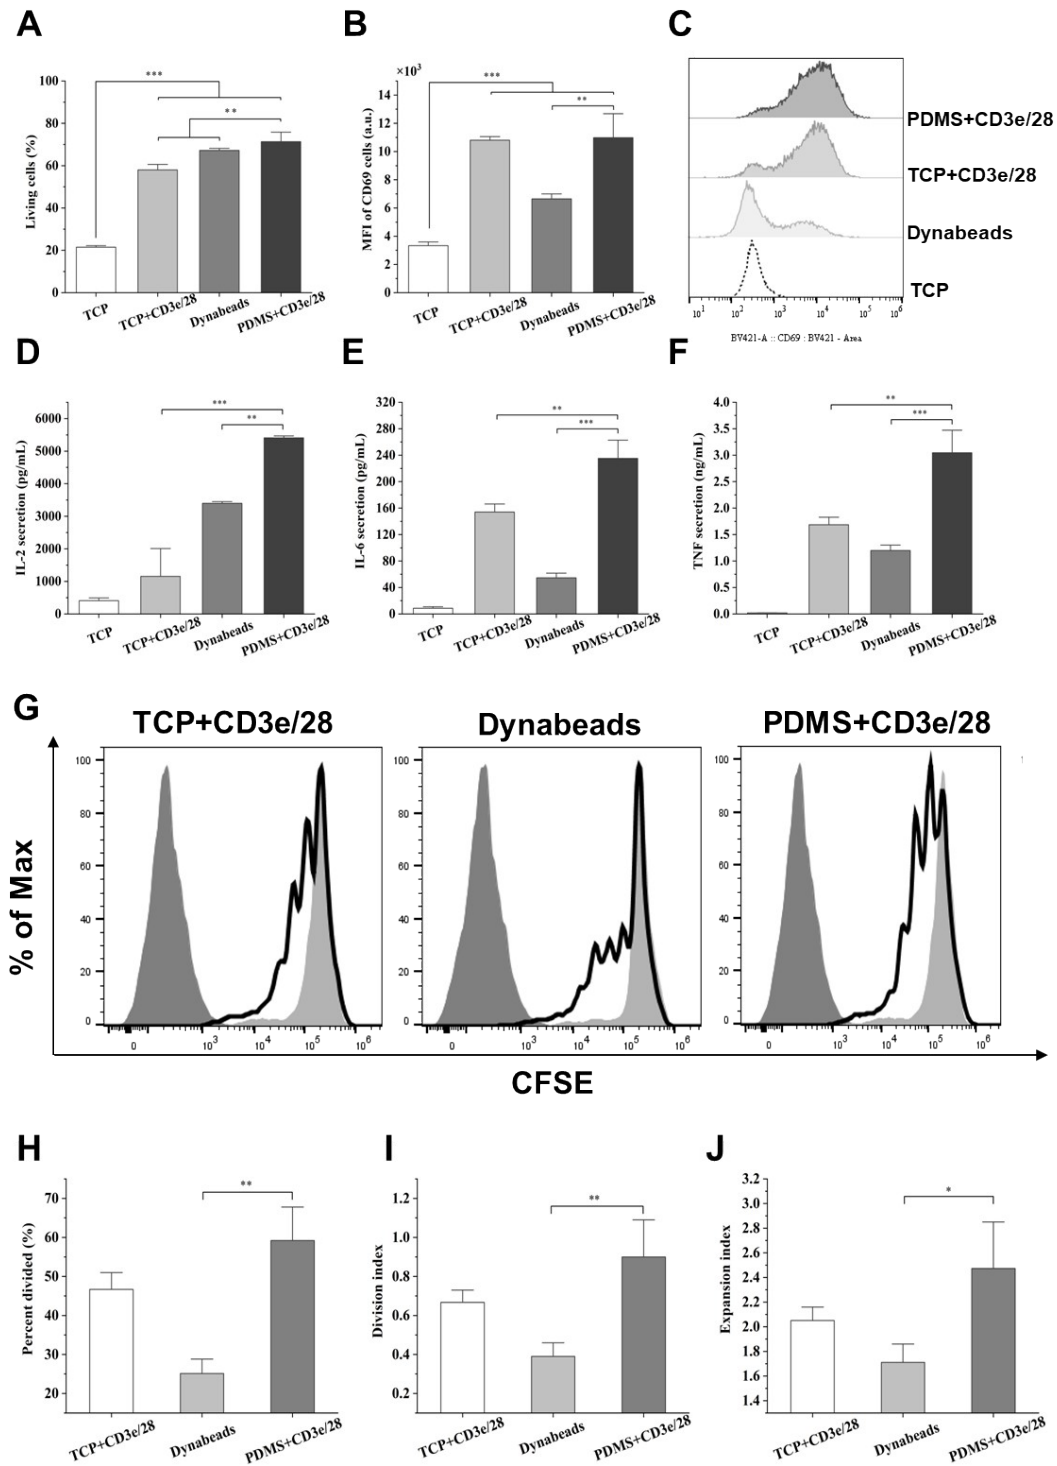

Figure S5. Enhanced T cell activation and proliferation by CD3/CD28 activating antibody immobilized on PDMS. Purified CD4<sup>+</sup> T cells were cultured in different conditions, including TCP group, CD3e/CD28 antibody coated on TCP (TCP + CD3/CD28), CD3/CD28 antibody coated on PDMS (PDMS + CD3/CD28) and Dynabeads for 3 days and then the viability, activation and proliferation of T cells was detected. (A) Viability of T cells detected by FACS. (B) Mean fluorescence intensity of CD69 expression. (C) Representative FACS plot of CD69 staining. IL-2 (D), IL-6 (E), and TNF (F) secretion in the culture supernatants was detected. (G) Representative CFSE dilution in T

cells in different conditions. The peak of light gray indicates control with no antibody coatings (TCP). The peak of dark gray indicates nonlabeled cells. (H) Percentage of divided T cells, (I) Division index (average number of divisions), and (J) Expansion index (fold-expansion of the whole cells) in different conditions were measured. Bars are mean  $\pm$  standard deviation (n=3). Statistical significance was determined by one-way ANOVA with Turkey's test ( $\alpha = 0.05$ , \* denotes  $p < 0.05$ , \*\* denotes  $p < 0.01$ , and \*\*\* denotes  $p < 0.001$ ).



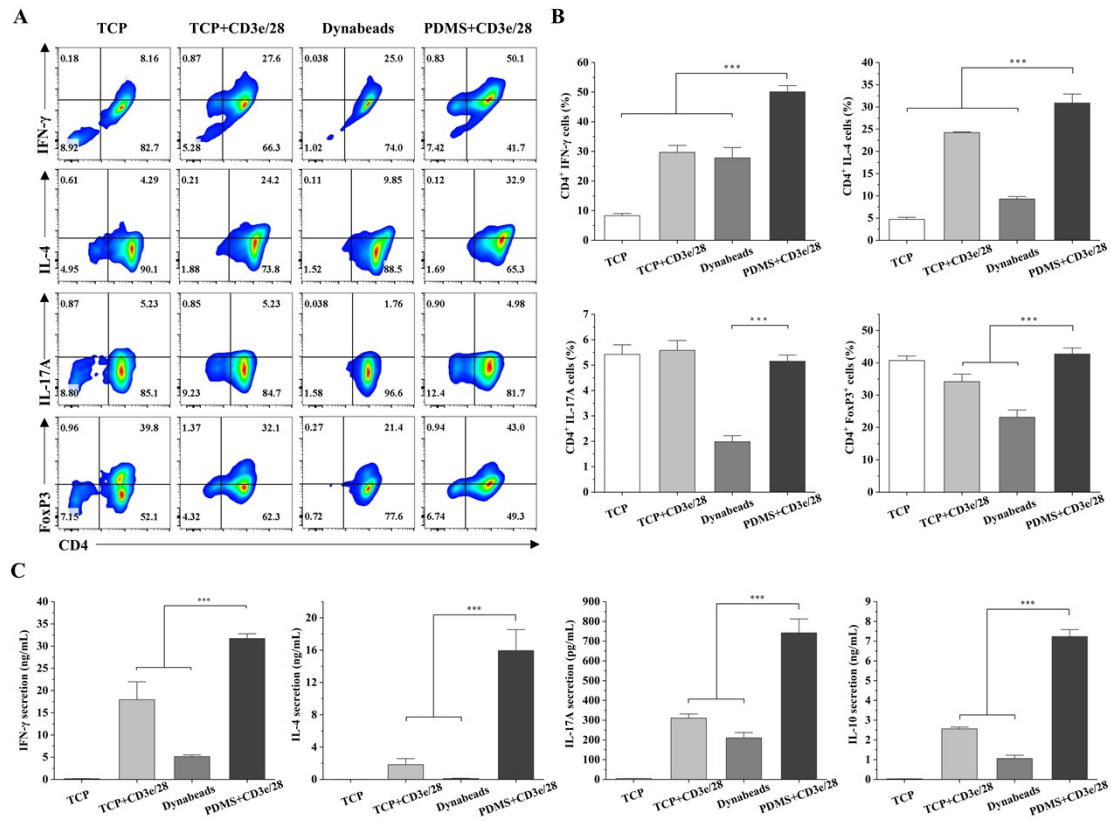

Figure S6. PDMS substrates enhance Th1 and Th2 cell differentiation. (A) Cells were stained for intracellular IFN- $\gamma$ , IL-4, IL-17A, and Foxp3 expression. (B) The results from (A) are presented as mean  $\pm$  SD (n=3). (C) The concentration of various cytokines from the cells culture in different conditions was analyzed by cytometric bead array (n=3 per group). Statistical significance was determined by one-way ANOVA with Turkey's test ( $\alpha = 0.05$ , \*\*\* denotes  $p < 0.001$ ).

Table 1 Summary of the XPS results

| Sample               | Total element (atom%) |       |       |      |
|----------------------|-----------------------|-------|-------|------|
|                      | C1s                   | O1s   | Si2p  | N1s  |
| PDMS                 | 50.05                 | 26.94 | 23.01 | —    |
| Activated PDMS       | 34.64                 | 40.10 | 25.26 | —    |
| PDMS-NH <sub>2</sub> | 57.56                 | 23.51 | 17.04 | 1.89 |
| PDMS-CHO             | 67.16                 | 18.33 | 13.15 | 1.37 |
| PDMS-COOH            | 50.67                 | 30.74 | 16.91 | 1.69 |
